# Supplementary material for: Dietary lipid content reorganizes gut microbiota and probiotic L. rhamnosus attenuates obesity and enhances catabolic hormonal milieu in zebrafish
Source: PubMed Central journal article supplement (PMC5514052; doi:10.1038/s41598-017-05147-w), 2017-07-17
Supplement: 41598_2017_5147_MOESM1_ESM.pdf [file 41598_2017_5147_MOESM1_ESM.pdf]

Dietary lipid content reorganizes gut microbiota and probiotic *L. rhamnosus* attenuates obesity and enhances catabolic hormonal milieu in zebrafish.

Silvia Falcinelli<sup>1</sup>, Ana Rodiles<sup>2</sup>, Azadeh Hatef<sup>3</sup>, Simona Picchietti<sup>4</sup>, Lina Cossignani<sup>5</sup>, Daniel L. Merrifield<sup>2</sup>, Suraj Unniappan<sup>3</sup> and Oliana Carnevali<sup>1\*</sup>

**Supplemental table S.2.**

**The probiotic *L. rhamnosus* changes weight in zebrafish fed a HFD and MFD.**

| Diets | Control        | Probiotic       |
|-------|----------------|-----------------|
| HFD   | 73.6 ± 10.2 mg | 47.1 ± 12.2 mg* |
| MFD   | 64.2 ± 12.7 mg | 46.0 ± 5.5 mg*  |
| LFD   | 57.1 ± 12.3 mg | 43.5 ± 5.5 mg   |

Values with asterisk are significantly different ( $P < 0.05$ ).

**Supplemental table S.3**

**Composition Chart of 5% fat diet (LFD)**

**Ingredient Restrictions**

| Ingredient              | Min(%) | Max(%) | Usage(%) | Batch(kg) |
|-------------------------|--------|--------|----------|-----------|
| Soyabean (Hamlet HP100) |        |        | 44.62    | 446.17    |
| Corn Starch             |        |        | 31.22    | 312.23    |
| Herring Meal LT94       | 15.00  | 15.00  | 15.00    | 150.00    |
| Dried Brewers Yeast     | 5.00   | 5.00   | 5.00     | 50.00     |
| Fish oil                |        |        | 2.56     | 25.59     |
| Vitamin Premix          | 1.00   | 1.00   | 1.00     | 10.00     |

|                          |      |      |      |      |
|--------------------------|------|------|------|------|
| CMC-binder               | 0.50 | 0.50 | 0.50 | 5.00 |
| Ascorbyl-Phosphate (DSM) | 0.10 | 0.10 | 0.10 | 1.00 |

### Nutrient Restrictions

| Nutrient            | Units | Min Limit | Max Limit | Actual | Shadow |
|---------------------|-------|-----------|-----------|--------|--------|
| 01. Dry Matter (DM) | %     |           | 100.00    | 94.93  |        |
| 02. Crude Protein   | %     | 38.00     | 38.00     | 38.00  | -0.00  |
| 03. DCP             | %     |           |           | 9.24   |        |
| 04. Crude lipid     | %     | 5.00      | 5.00      | 5.00   | 0.01   |
| 06. Crude Fiber     | %     |           |           | 1.22   | 0.00   |
| 07. Phosphorous     | %     |           |           | 0.64   |        |
| 08. Calcium         | %     |           |           | 0.46   |        |
| 09. Magnesium       | %     |           |           | 0.19   |        |
| 10. Avail. Phos.    | %     |           |           | 0.25   |        |
| 11. Ash             | %     |           |           | 3.03   |        |
| 12. Lysine          | %     |           |           | 2.42   |        |
| 13. Methionine      | %     |           |           | 0.63   |        |
| 14. Met + Cys       | %     |           |           | 0.42   |        |
| 15. Arginine        | %     |           |           | 2.56   | -0.00  |
| 16. Histidine       | %     |           |           | 0.92   |        |
| 17. Threonine       | %     |           |           | 1.45   |        |
| 18. Tryptophan      | %     |           |           | 0.47   |        |
| 19. Leucine         | %     |           |           | 2.78   | 0.00   |

|                   |       |  |  |       |
|-------------------|-------|--|--|-------|
| 20. Isoleucine    | %     |  |  | 1.67  |
| 21. Phenylalanine | %     |  |  | 1.70  |
| 22. Valine        | %     |  |  | 1.89  |
| 24. Vitamin E     | mg/kg |  |  | 44.60 |
| 26. Choline       | mg/g  |  |  | 1.54  |
| 27. Vitamin C     | mg/kg |  |  | 0.05  |

### Composition Chart of 10% fat diet (MFD)

#### Ingredient Restrictions

| Ingredient               | Min(%) | Max(%) | Usage(%) | Batch(kg) |
|--------------------------|--------|--------|----------|-----------|
| Soyabean (Hamlet HP100)  |        |        | 44.62    | 446.17    |
| Corn Starch              |        |        | 26.22    | 262.23    |
| Herring Meal LT94        | 15.00  | 15.00  | 15.00    | 150.00    |
| Fish oil                 |        |        | 7.56     | 75.59     |
| Dried Brewers Yeast      | 5.00   | 5.00   | 5.00     | 50.00     |
| Vitamin Premix           | 1.00   | 1.00   | 1.00     | 10.00     |
| CMC-binder               | 0.50   | 0.50   | 0.50     | 5.00      |
| Ascorbyl-Phosphate (DSM) | 0.10   | 0.10   | 0.10     | 1.00      |

#### Nutrient Restrictions

| Nutrient            | Units | Min Limit | Max Limit | Actual | Shadow |
|---------------------|-------|-----------|-----------|--------|--------|
| 01. Dry Matter (DM) | %     |           | 100.00    | 94.93  |        |
| 02. Crude Protein   | %     | 38.00     | 38.00     | 38.00  | -0.00  |

|                   |       |       |       |       |       |
|-------------------|-------|-------|-------|-------|-------|
| 03. DCP           | %     |       |       | 9.24  |       |
| 04. Crude lipid   | %     | 10.00 | 10.00 | 10.00 | 0.01  |
| 06. Crude Fiber   | %     |       |       | 1.22  | 0.00  |
| 07. Phosphorous   | %     |       |       | 0.64  |       |
| 08. Calcium       | %     |       |       | 0.46  |       |
| 09. Magnesium     | %     |       |       | 0.19  |       |
| 10. Avail. Phos.  | %     |       |       | 0.25  |       |
| 11. Ash           | %     |       |       | 3.03  |       |
| 12. Lysine        | %     |       |       | 2.42  |       |
| 13. Methionine    | %     |       |       | 0.63  |       |
| 14. Met + Cys     | %     |       |       | 0.42  |       |
| 15. Arginine      | %     |       |       | 2.56  | -0.00 |
| 16. Histidine     | %     |       |       | 0.92  |       |
| 17. Threonine     | %     |       |       | 1.45  |       |
| 18. Tryptophan    | %     |       |       | 0.47  |       |
| 19. Leucine       | %     |       |       | 2.78  | 0.00  |
| 20. Isoleucine    | %     |       |       | 1.67  |       |
| 21. Phenylalanine | %     |       |       | 1.70  |       |
| 22. Valine        | %     |       |       | 1.89  |       |
| 24. Vitamin E     | mg/kg |       |       | 44.60 |       |
| 26. Choline       | mg/g  |       |       | 1.54  |       |
| 27. Vitamin C     | mg/kg |       |       | 0.05  |       |

## Composition Chart of 15% fat diet (HFD)

### Ingredient Restrictions

| Ingredient               | Min(%) | Max(%) | Usage(%) | Batch(kg) |
|--------------------------|--------|--------|----------|-----------|
| Soyabean (Hamlet HP100)  |        |        | 44.62    | 446.17    |
| Corn Starch              |        |        | 21.22    | 212.23    |
| Herring Meal LT94        | 15.00  | 15.00  | 15.00    | 150.00    |
| Fish oil                 |        |        | 12.56    | 125.59    |
| Dried Brewers Yeast      | 5.00   | 5.00   | 5.00     | 50.00     |
| Vitamin Premix           | 1.00   | 1.00   | 1.00     | 10.00     |
| CMC-binder               | 0.50   | 0.50   | 0.50     | 5.00      |
| Ascorbyl-Phosphate (DSM) | 0.10   | 0.10   | 0.10     | 1.00      |

### Nutrient Restrictions

| Nutrient            | Units | Min Limit | Max Limit | Actual | Shadow |
|---------------------|-------|-----------|-----------|--------|--------|
| 01. Dry Matter (DM) | %     |           | 100.00    | 94.93  |        |
| 02. Crude Protein   | %     | 38.00     | 38.00     | 38.00  | -0.00  |
| 03. DCP             | %     |           |           | 9.24   |        |
| 04. Crude lipid     | %     | 15.00     | 15.00     | 15.00  | 0.01   |
| 06. Crude Fiber     | %     |           |           | 1.22   | 0.00   |
| 07. Phosphorous     | %     |           |           | 0.64   |        |
| 08. Calcium         | %     |           |           | 0.46   |        |
| 09. Magnesium       | %     |           |           | 0.19   |        |
| 10. Avail. Phos.    | %     |           |           | 0.25   |        |

|                   |       |  |  |       |       |
|-------------------|-------|--|--|-------|-------|
| 11. Ash           | %     |  |  | 3.03  |       |
| 12. Lysine        | %     |  |  | 2.42  |       |
| 13. Methionine    | %     |  |  | 0.63  |       |
| 14. Met + Cys     | %     |  |  | 0.42  |       |
| 15. Arginine      | %     |  |  | 2.56  | -0.00 |
| 16. Histidine     | %     |  |  | 0.92  |       |
| 17. Threonine     | %     |  |  | 1.45  |       |
| 18. Tryptophan    | %     |  |  | 0.47  |       |
| 19. Leucine       | %     |  |  | 2.78  | 0.00  |
| 20. Isoleucine    | %     |  |  | 1.67  |       |
| 21. Phenylalanine | %     |  |  | 1.70  |       |
| 22. Valine        | %     |  |  | 1.89  |       |
| 24. Vitamin E     | mg/kg |  |  | 44.60 |       |
| 26. Choline       | mg/g  |  |  | 1.54  |       |
| 27. Vitamin C     | mg/kg |  |  | 0.05  |       |

#### Supplemental table S.4.

#### Primer sequences used for real-time polymerase chain reaction analyses

| Gene          | Forward                         | Reverse                           |
|---------------|---------------------------------|-----------------------------------|
| <i>nucb2a</i> | 5'- AGGAGCGGCATGAAGAATTT -3'    | 5'- GATGGTTGACTTTGGGGTGA -3'      |
| <i>gcga</i>   | 5'- CAGAGGGAACCTTTCTCCAACGA -3' | 5'- AGTTCATACCCATTTCTCTTAGCGT -3' |
| <i>npv</i>    | 5'- GTCTGCTTGGGGACTCTCAC -3'    | 5'- CGGGACTCTGTTTCACCAAT -3'      |
| <i>npc111</i> | 5'-GTCGGAAGGGTAAGAGCACC -3'     | 5'-ATCACAAGGCAGACCGGAAG -3'       |
| <i>mgll</i>   | 5'- CGAGAGGCCCGCAGGATTTTA -3'   | 5'- TGAGTTTAGGAGCCAAGCG -3'       |
| <i>fit2</i>   | 5'- CTGGTCTCCCTCCACAGCCGA -3'   | 5'- ACACCAGCTGCCCTCCGCTT -3'      |
| <i>hnf4a</i>  | 5'- ACGGTTCCGGCAGCTGCTTC -3'    | 5'- TCCTGGACCAGATGGGGGTGT -3'     |
| <i>rplp</i>   | 5'-CTGAACATCTCGCCCTTCTC -3'     | 5'-TAGCCGATCTGCAGACACAC-3'        |
| <i>β-act</i>  | 5'-GGTACCCATCTCCTGCTCCAA-3'     | 5'-GAGCGTGGCTACTCCTTACC-3'        |

SUPPLEMENTAL FIGURE AND FIGURE LEGEND

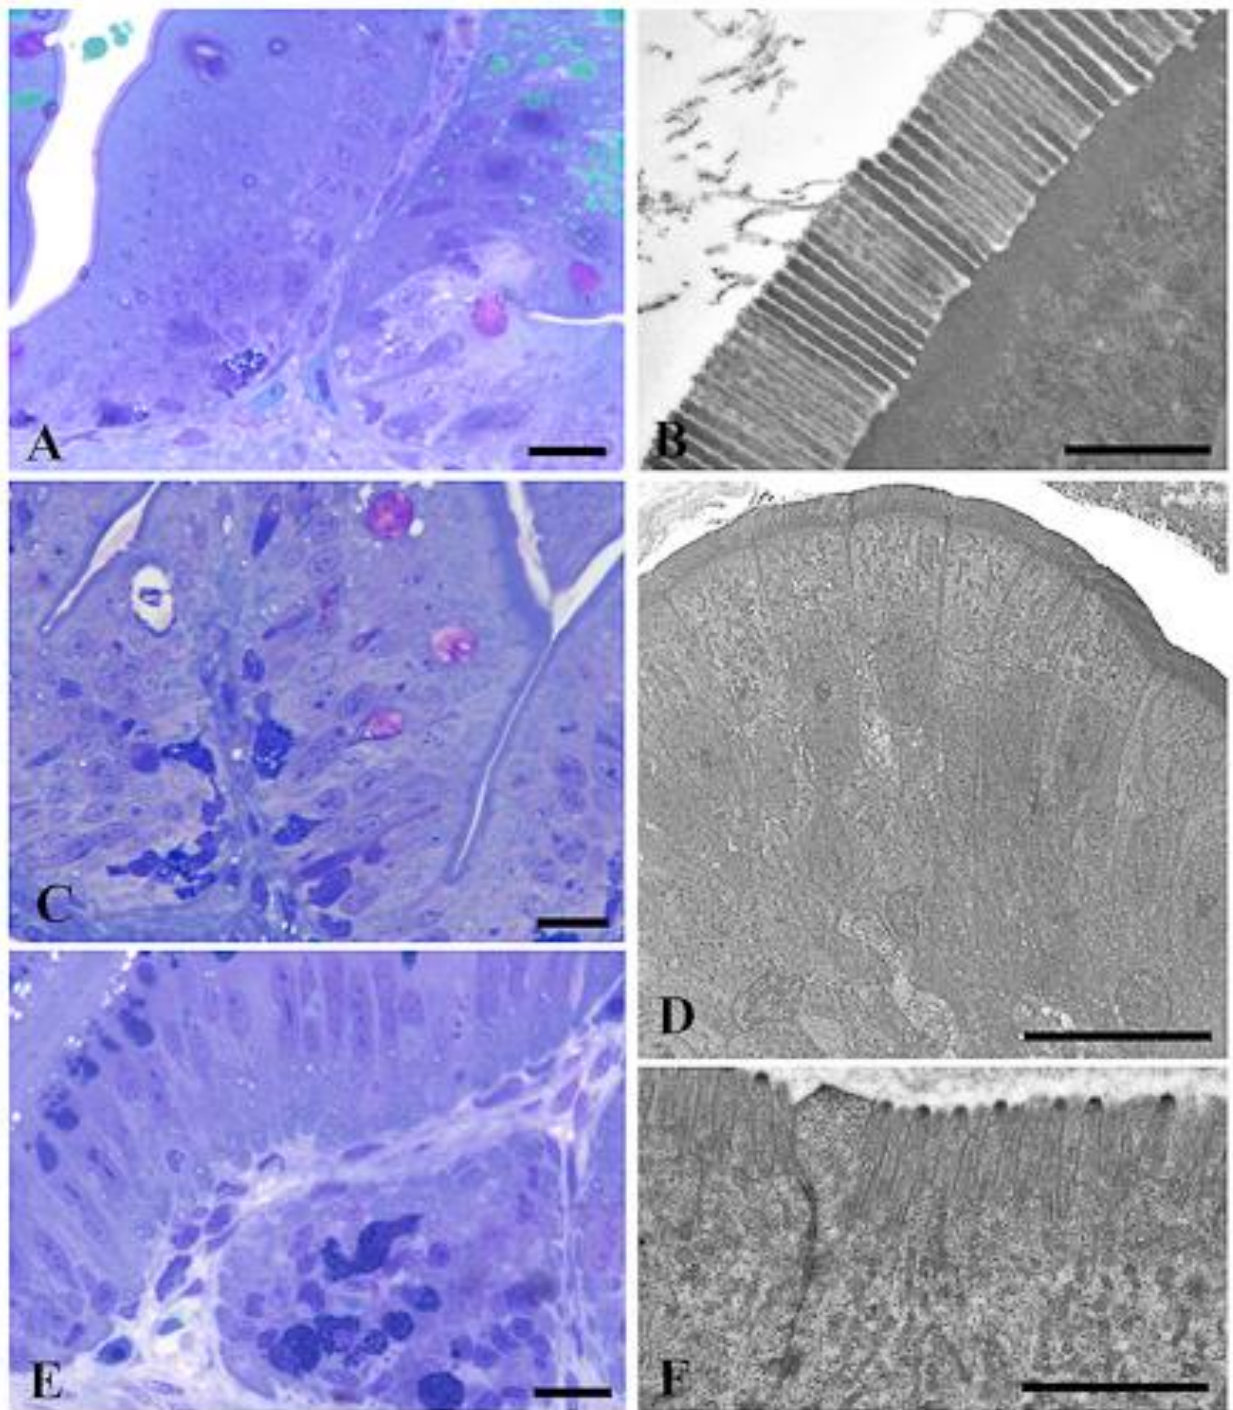

**Supplemental Fig 6. *Lactobacillus rhamnosus* did not alter intestinal mucosal epithelium in zebrafish fed a HFD-P, MFD-P and LFD-P.**

Micrographs showed the absence of damage signs in the intestine of fish fed with diet probiotic enriched (Figs. 6 A-F).

Micrograph also showed an intact intestinal mucosal epithelium with intracellular tight junctions epithelial integrity, well organized microvilli and no cell debris in the intestinal lumen of zebrafish fed a HFD-P, MFD-P and LFD-P (Fig. 6 B, D, F).

Scale bar: A, C, D ed E = 10  $\mu$ m, B ed F = 1  $\mu$ m
